# Supplementary material for: Low Recombination Proficiency Score (RPS) Predicts Heightened Sensitivity to DNA-Damaging Chemotherapy in Breast Cancer
Source: Oxford University Press journal article supplement (doi:10.1158/1078-0432.ccr-16-2845), 2017-03-24
Supplement: 10780432ccr162845-sup-174560_3_supp_3907538_hmrmc9.xlsx [file 10780432ccr162845-sup-174560_3_supp_3907538_hmrmc9.xlsx]

## Sheet: TableS1
GEO ID	Platform	Total Samples	Samples with clinical data	Samples with complete clinical data	Duplicate Samples	Unique Samples
GSE20194	hgu133a	278	257	250	20	230
GSE20271	hgu133a	178	91	76	31	45
GSE25055	hgu133a	310	310	275	188	87
GSE25065	hgu133a	198	198	168	28	140
GSE42822	hgu133a	91	66	52	41	11
TOTAL		1055	922	821	308	513

## Sheet: TableS2
GEOID	Platform	Total Samples
GSE3494	hgu133a	251
GSE4611	hgu133a	216
GSE4922	hgu133a	289
Total		756

## Sheet: TableS3
GEO ID
GSM505334
GSM505338
GSM505350
GSM505351
GSM505355
GSM505356
GSM505365
GSM505374
GSM505410
GSM505412
GSM505413
GSM505415
GSM505416
GSM505464
GSM505467
GSM505468
GSM505473
GSM505477
GSM505479
GSM505582
GSM508112
GSM508115
GSM508116
GSM508119
GSM508120
GSM508121
GSM508122
GSM508124
GSM508125
GSM508127
GSM508128
GSM508129
GSM508130
GSM508132
GSM508133
GSM508139
GSM508147
GSM508163
GSM508172
GSM508173
GSM508175
GSM508176
GSM508180
GSM508182
GSM508183
GSM508184
GSM508185
GSM508186
GSM508187
GSM508188
GSM508189
GSM615179
GSM615180
GSM615181
GSM615182
GSM615183
GSM615184
GSM615185
GSM615186
GSM615187
GSM615188
GSM615189
GSM615190
GSM615191
GSM615192
GSM615193
GSM615194
GSM615196
GSM615197
GSM615198
GSM615199
GSM615200
GSM615201
GSM615202
GSM615203
GSM615204
GSM615205
GSM615206
GSM615207
GSM615208
GSM615209
GSM615210
GSM615211
GSM615212
GSM615213
GSM615214
GSM615215
GSM615216
GSM615217
GSM615219
GSM615220
GSM615221
GSM615222
GSM615224
GSM615225
GSM615226
GSM615227
GSM615228
GSM615229
GSM615230
GSM615231
GSM615232
GSM615233
GSM615234
GSM615235
GSM615236
GSM615237
GSM615238
GSM615239
GSM615240
GSM615241
GSM615242
GSM615243
GSM615244
GSM615245
GSM615246
GSM615247
GSM615248
GSM615249
GSM615250
GSM615251
GSM615252
GSM615253
GSM615254
GSM615255
GSM615256
GSM615257
GSM615258
GSM615259
GSM615260
GSM615261
GSM615262
GSM615264
GSM615265
GSM615266
GSM615267
GSM615268
GSM615269
GSM615270
GSM615271
GSM615272
GSM615273
GSM615274
GSM615275
GSM615276
GSM615277
GSM615278
GSM615279
GSM615280
GSM615281
GSM615282
GSM615283
GSM615284
GSM615285
GSM615286
GSM615287
GSM615288
GSM615289
GSM615290
GSM615291
GSM615292
GSM615293
GSM615294
GSM615295
GSM615296
GSM615297
GSM615298
GSM615299
GSM615300
GSM615301
GSM615302
GSM615303
GSM615304
GSM615305
GSM615307
GSM615309
GSM615312
GSM615313
GSM615316
GSM615318
GSM615320
GSM615321
GSM615322
GSM615324
GSM615328
GSM615329
GSM615330
GSM615331
GSM615332
GSM615333
GSM615334
GSM615335
GSM615336
GSM615337
GSM615338
GSM615339
GSM615340
GSM615341
GSM615342
GSM615343
GSM615344
GSM615345
GSM615347
GSM615348
GSM615349
GSM615350
GSM615351
GSM615352
GSM615354
GSM615355
GSM615356
GSM615357
GSM615359
GSM615360
GSM615361
GSM615362
GSM615363
GSM615365
GSM615366
GSM615367
GSM615369
GSM615370
GSM615373
GSM615374
GSM615377
GSM615381
GSM615383
GSM615386
GSM615388
GSM615389
GSM615391
GSM615395
GSM615398
GSM615400
GSM615401
GSM615402
GSM615403
GSM615404
GSM615405
GSM615631
GSM615633
GSM615657
GSM615666
GSM615668
GSM615677
GSM615679
GSM615774
GSM615775
GSM615777
GSM615778
GSM615780
GSM615794
GSM615795
GSM615796
GSM615798
GSM615801
GSM615813
GSM615815
GSM615816
GSM615817
GSM615818
GSM615821
GSM615823
GSM615824
GSM615826
GSM615827
GSM615828
GSM1050577
GSM1050578
GSM1050579
GSM1050582
GSM1050584
GSM1050587
GSM1050590
GSM1050591
GSM1050594
GSM1050595
GSM1050596
GSM1050601
GSM1050602
GSM1050603
GSM1050606
GSM1050607
GSM1050610
GSM1050611
GSM1050612
GSM1050613
GSM1050615
GSM1050616
GSM1050617
GSM1050619
GSM1050620
GSM1050622
GSM1050623
GSM1050624
GSM1050625
GSM1050627
GSM1050628
GSM1050629
GSM1050631
GSM1050633
GSM1050634
GSM1050635
GSM1050636
GSM1050637
GSM1050638
GSM1050640
GSM1050641

## Sheet: TableS4
Model Metrics	Percentage
Sensitivity	0.809524
Specificity	0.666667
Positive Predictive Value	0.386364
Negative Predictive Value	0.931034
Balanced Accuracy	0.738095

## Sheet: TableS5
GEO ID	Age≥50	ER+	HER2+	T3,4	LN+	Grade3	Subtype	pCR	RIF1.zscore	PARPBP.zscore	RAD51.zscore	XRCC5.zscore	RPSb	Training/ Test set
GSM1050581	0	0	1	1	1	1	NA	0	-0.632718	0.774154	0.829746	-0.705334	-0.0255833	testing
GSM1050583	0	1	1	1	0	1	NA	0	-1.02903	-0.431456	1.52486	-0.812776	0.134955	NA
GSM1050585	0	1	0	1	1	0	NA	0	-0.123305	0.463493	0.544875	0.548427	-0.385048	NA
GSM1050598	1	0	0	1	1	1	NA	1	-1.02635	0.0608722	0.617217	-3.33387	1.07254	testing
GSM1050599	1	0	0	0	1	1	NA	0	-0.806626	0.0471859	-0.151101	0.0288588	0.199077	training
GSM1050600	1	0	1	1	1	0	NA	1	-0.132691	0.107876	2.06512	1.22195	-0.945636	testing
GSM1050608	1	0	1	1	1	1	NA	0	-1.37865	-0.306567	1.0538	-3.31429	1.09298	training
GSM1050614	1	1	1	1	1	1	NA	1	-0.0363562	-0.677497	-0.0506758	-0.969907	0.454462	NA
GSM1050618	1	0	1	1	0	0	NA	1	-0.127039	-1.73489	0.284027	1.20131	-0.086151	testing
GSM1050621	0	0	0	1	1	1	NA	0	1.46236	1.64139	1.9114	0.15308	-1.21637	testing
GSM1050626	0	0	0	0	0	1	NA	0	0.941105	1.6981	0.418485	-1.38867	-0.220896	testing
GSM505327	1	1	0	0	0	0	Luminal A	0	-0.492762	0.900535	-0.0171345	0.792016	-0.308968	NA
GSM505328	1	1	0	0	1	0	Luminal A	0	-0.72844	-1.06	0.131192	0.307223	0.232737	NA
GSM505329	1	1	1	1	1	0	Luminal B	0	-0.432098	1.49163	2.11924	0.650038	-0.987729	NA
GSM505330	1	1	0	0	1	0	Luminal A	0	-0.316269	0.912476	0.867545	-0.878108	-0.078188	NA
GSM505331	1	0	0	0	0	1	Luminal B	0	-0.410107	1.276	1.12287	-0.823031	-0.216689	training
GSM505335	0	0	1	0	1	1	Her2	1	-1.05215	-0.727065	1.4913	-1.84833	0.527801	training
GSM505336	1	0	0	0	1	1	Basal	1	3.84322	2.03046	4.498	0.585744	-2.66303	testing
GSM505337	0	1	0	1	1	1	Luminal B	0	-0.883904	-0.104949	1.22368	-1.97323	0.483385	NA
GSM505339	0	1	0	1	0	1	Luminal B	1	0.289687	3.69221	2.22672	-0.56758	-1.22526	NA
GSM505340	1	0	1	0	0	1	Her2	0	-0.344646	-0.615677	0.879975	0.0271796	-0.0586639	testing
GSM505341	0	0	1	0	1	1	Luminal A	1	-1.37393	-0.196191	0.499812	-0.881135	0.47052	testing
GSM505342	1	0	1	0	0	1	Her2	1	-0.57039	1.35838	1.36378	-1.05055	-0.194443	training
GSM505343	1	0	0	0	1	1	Her2	0	-1.11876	-0.694481	0.593705	-3.4176	1.2721	training
GSM505344	0	0	0	0	1	1	Basal	1	-0.689625	1.14368	5.17206	-0.766849	-1.27455	training
GSM505345	1	0	0	0	0	1	Basal	0	0.0442292	-0.401401	1.15258	-2.99058	0.674645	training
GSM505346	1	1	0	0	0	1	Luminal B	0	-0.163061	1.77695	2.81382	0.0761184	-1.1171	NA
GSM505347	1	1	0	0	0	0	Luminal A	0	-0.350823	-1.29274	0.531454	-0.0791495	0.204395	NA
GSM505348	0	1	0	1	1	1	Luminal A	0	-0.522267	1.84625	1.13613	-1.91193	0.0304889	NA
GSM505349	0	0	1	1	1	1	Her2	1	-0.0168286	1.27287	1.19213	0.633853	-0.772295	training
GSM505352	1	1	0	0	1	0	Luminal A	0	-0.716425	-1.18812	-0.00905707	0.00515517	0.387718	NA
GSM505353	1	1	0	0	1	0	Luminal B	0	-1.48817	1.4308	2.70768	0.93208	-0.997754	NA
GSM505354	0	1	0	0	1	0	Luminal A	0	-1.66305	-1.50369	-0.571661	0.109729	0.778847	NA
GSM505357	0	0	0	0	1	1	Her2	1	-1.56152	0.51166	2.21721	1.40691	-0.813616	testing
GSM505358	0	0	0	0	0	1	Basal	1	3.92269	3.31832	1.62434	1.42243	-2.39051	testing
GSM505359	0	0	0	0	0	1	Basal	1	0.097511	0.75949	1.36044	-0.513261	-0.388516	training
GSM505360	1	0	0	1	1	1	Basal	1	-0.0130283	0.0209264	0.493947	-0.206438	-0.0747269	training
GSM505361	1	1	0	0	0	0	Luminal A	0	-0.511063	-0.194462	1.09334	0.599424	-0.341244	NA
GSM505362	1	1	1	1	0	1	Luminal A	0	-2.24066	0.0276726	1.00357	-2.11261	0.856642	NA
GSM505363	1	1	0	0	1	0	Luminal B	0	0.144638	2.36904	2.7609	0.0525983	-1.27713	NA
GSM505364	1	1	0	0	0	0	Luminal A	0	-1.16457	0.74114	0.187964	-0.515347	0.216055	NA
GSM505366	1	1	0	0	0	0	Luminal A	0	-0.212761	-1.02382	0.213991	0.520277	0.0246447	NA
GSM505367	0	1	1	1	0	1	Luminal B	0	-0.660219	2.45443	1.39555	0.544602	-0.891491	NA
GSM505368	1	1	0	1	1	0	Luminal A	1	-0.597847	0.156179	0.82721	1.21569	-0.507581	NA
GSM505369	1	0	0	1	0	1	Basal	0	-0.483529	1.16723	2.16159	0.235439	-0.796713	testing
GSM505370	0	0	0	0	1	1	Basal	1	-0.119833	0.267457	1.4921	-0.446741	-0.302822	training
GSM505371	0	1	0	0	0	0	Luminal A	0	-1.52528	-1.63386	-0.0508219	-1.31638	1.07132	NA
GSM505372	0	0	0	0	0	1	Basal	0	-1.08654	-0.800244	1.13228	-0.394129	0.198717	training
GSM505373	1	0	1	0	1	1	Her2	1	-1.64196	2.41416	2.30443	-0.490957	-0.602456	testing
GSM505375	1	1	0	1	1	0	Luminal A	0	-0.741067	-1.97902	0.311641	-0.388166	0.579646	NA
GSM505376	1	0	1	1	1	1	Her2	0	-0.93815	0.317134	1.7779	-2.45005	0.406566	testing
GSM505377	1	0	1	1	1	1	Her2	0	-0.297388	-0.918133	2.01712	-2.22774	0.372355	testing
GSM505378	1	1	0	0	1	0	Luminal B	0	0.562076	1.74892	2.0379	0.563476	-1.20421	NA
GSM505379	1	1	0	0	1	0	Luminal B	0	-0.143555	1.86072	1.0728	0.608813	-0.818213	NA
GSM505382	0	1	0	0	1	1	Luminal A	0	0.105057	0.373524	-0.791955	0.836983	-0.134517	NA
GSM505383	0	1	0	0	1	1	Luminal A	0	-0.888154	-0.811611	-0.806837	0.427664	0.442804	NA
GSM505384	1	1	1	0	1	1	Her2	0	-0.378477	-0.114478	2.26227	0.217606	-0.592577	NA
GSM505385	1	1	1	0	1	1	Her2	0	-0.751987	0.397751	1.64131	0.224514	-0.440487	NA
GSM505386	1	0	1	0	0	1	Her2	1	-1.19981	0.79403	0.653879	-1.15371	0.2816	training
GSM505387	1	0	1	0	0	1	Her2	1	-0.833908	-0.0549344	1.29233	-0.968	0.13213	testing
GSM505388	1	1	1	1	1	1	Luminal B	0	-0.0525105	0.727783	3.63689	2.05481	-1.77925	NA
GSM505389	1	1	1	1	1	1	Luminal B	0	0.185982	0.517926	3.61785	1.89558	-1.73555	NA
GSM505390	1	1	1	0	0	0	Basal	1	-0.714257	-0.210484	0.00716046	0.720878	-0.0293614	NA
GSM505391	1	1	1	0	0	0	Her2	1	0.0594854	0.493935	0.764083	1.07382	-0.654509	NA
GSM505392	1	1	0	0	1	1	Luminal A	0	-0.120961	1.05363	0.295163	0.291046	-0.35114	NA
GSM505393	1	1	0	0	1	1	Luminal A	0	0.717891	1.14512	0.481247	0.72976	-0.738857	NA
GSM505396	1	1	0	1	0	0	Normal	0	-0.841498	-1.3044	1.63347	-5.01481	1.53627	NA
GSM505397	1	1	0	1	0	0	Normal	0	-1.46528	-0.463314	1.36196	-5.04812	1.59392	NA
GSM505398	0	1	0	0	1	1	Normal	0	-0.402342	1.58765	0.762361	-0.71874	-0.21102	NA
GSM505399	0	1	0	0	1	1	Luminal A	0	-0.389462	1.79982	0.859802	-0.372244	-0.389619	NA
GSM505400	1	0	1	1	1	1	Her2	0	0.623594	2.45802	2.24637	-1.35435	-0.819183	testing
GSM505401	1	0	1	1	1	1	Her2	0	0.616464	1.71818	2.66041	-1.44035	-0.762225	training
GSM505402	1	1	0	0	0	0	Luminal A	0	-1.7007	-0.924104	-0.7521	-1.64887	1.2695	NA
GSM505403	1	1	0	0	0	0	Luminal A	0	-1.05376	-1.97589	-1.1695	-1.42475	1.38042	NA
GSM505404	1	1	1	0	0	0	Luminal A	0	-1.49947	-0.091077	-0.150193	-0.542193	0.553168	NA
GSM505405	1	1	1	0	0	0	Luminal A	0	-0.323563	0.119319	0.714324	0.146288	-0.1971	NA
GSM505406	1	1	0	0	1	1	Luminal A	0	-0.716042	-1.2687	0.66324	-0.24036	0.29231	NA
GSM505407	1	1	0	0	1	1	Luminal A	0	-0.134826	-1.15436	-0.0390919	-0.1838	0.321781	NA
GSM505408	1	1	0	1	0	1	Luminal B	0	0.156126	2.69969	2.63657	0.388776	-1.41357	NA
GSM505409	1	1	0	1	0	1	Luminal B	0	-0.424136	2.21725	2.43096	0.123107	-1.05411	NA
GSM505411	0	0	0	1	1	1	Basal	1	-0.091467	2.02862	1.06609	-1.47067	-0.215821	testing
GSM505414	1	1	1	1	1	1	Normal	0	-0.730411	0.346834	0.768706	-0.845837	0.139328	NA
GSM505417	1	0	1	1	1	1	Basal	0	-0.481667	2.56691	2.58111	-0.148932	-1.06714	testing
GSM505418	1	0	1	1	1	1	Her2	0	0.205203	-0.798161	0.312925	0.117272	-0.0126567	testing
GSM505419	1	0	1	0	1	1	Her2	1	-0.386625	0.616167	1.15606	-1.36941	0.0667359	testing
GSM505420	0	1	0	0	0	0	Luminal A	0	-0.0444717	-0.99687	0.829986	1.81435	-0.589658	NA
GSM505421	1	0	0	1	1	1	Basal	0	0.218247	2.18591	2.80435	0.0569178	-1.2709	testing
GSM505422	1	1	0	1	1	0	Luminal A	0	-0.337045	0.529647	-0.184789	0.408635	-0.105116	NA
GSM505423	0	0	0	0	1	1	Basal	1	0.880015	1.92227	1.36624	-1.08222	-0.61	training
GSM505424	0	1	0	0	1	0	Luminal B	0	0.126983	0.384318	0.446714	-2.32236	0.493098	NA
GSM505425	1	0	1	0	1	1	Her2	0	-0.274202	2.32322	0.565403	-0.671428	-0.341849	training
GSM505426	1	1	0	0	0	0	Luminal A	0	-0.33307	-0.71681	0.739277	-0.0848291	0.0323771	NA
GSM505427	1	1	0	0	1	1	Her2	0	-1.78538	-0.0667486	1.36842	-0.741566	0.249678	NA
GSM505428	0	0	0	1	1	1	Basal	1	-1.23108	0.182	0.0415575	-0.694589	0.435615	testing
GSM505429	0	1	1	1	0	1	Luminal A	0	-1.4203	-1.52552	0.0560322	-0.726789	0.814966	NA
GSM505430	0	1	0	0	0	0	Luminal B	0	0.425098	0.776752	1.50111	-0.437184	-0.525739	NA
GSM505431	1	1	1	0	0	1	Luminal B	0	-1.04612	1.06576	0.616487	0.681715	-0.363118	NA
GSM505432	1	0	0	0	1	1	Luminal A	0	-1.5479	-0.407009	-0.340014	-0.209553	0.5749	training
GSM505433	0	1	0	1	1	0	Luminal A	0	-1.43457	-0.181206	-0.0955193	-1.81376	0.935511	NA
GSM505435	1	0	1	0	1	0	Her2	1	-0.637099	0.147906	-0.450312	-0.635344	0.431796	training
GSM505436	0	1	0	1	1	1	Basal	1	0.417552	1.0587	1.19246	-5.27355	1.0059	NA
GSM505438	0	0	0	1	1	1	Basal	1	-1.67046	-0.372764	0.422461	0.0860497	0.291032	testing
GSM505439	1	0	1	0	1	0	Luminal B	1	-1.57084	-0.480424	0.210141	-0.866589	0.644702	training
GSM505440	1	0	0	0	1	1	Luminal A	0	-1.26016	-1.65132	-0.445219	-0.103396	0.750961	training
GSM505441	1	1	1	0	0	1	Luminal B	0	-0.379945	0.48745	0.749932	1.33259	-0.634093	NA
GSM505442	1	1	0	0	1	1	Luminal B	0	-0.991552	-0.226582	2.20506	0.00391076	-0.35548	NA
GSM505443	0	1	1	1	0	1	Luminal A	0	-1.05523	-1.47073	-0.217119	0.036038	0.564619	NA
GSM505444	0	1	0	0	0	0	Luminal B	0	-0.758514	-0.280231	2.39524	-0.329272	-0.345302	NA
GSM505446	0	1	0	1	1	0	Luminal A	0	-1.93198	-0.372823	0.0231588	-2.03189	1.11539	NA
GSM505448	0	1	0	0	1	1	Luminal A	0	-0.568353	-1.99474	-1.39779	0.19669	0.839668	NA
GSM505449	0	1	0	1	1	1	Her2	1	-0.948992	-0.17559	-0.355062	-0.821292	0.593604	NA
GSM505450	1	0	0	1	1	1	Her2	0	0.171919	1.70434	1.70764	0.842989	-1.10554	testing
GSM505451	0	1	0	0	1	0	Luminal A	0	-0.357559	-0.389612	-0.10248	1.17264	-0.181459	NA
GSM505452	0	1	0	0	1	0	Luminal A	0	-0.978585	-0.837668	-0.396295	-1.35597	0.906074	NA
GSM505453	0	1	0	0	1	0	Luminal B	0	-1.04655	-0.756706	-1.13596	-0.0941383	0.719835	NA
GSM505454	0	0	0	0	1	1	Basal	1	0.687466	2.26848	2.52333	1.64456	-1.80272	training
GSM505455	1	1	0	1	1	1	Luminal B	1	-0.449326	3.70437	1.40683	-0.533203	-0.849629	NA
GSM505456	0	1	0	1	1	0	Luminal B	0	0.073734	0.255913	0.60627	1.26887	-0.627814	NA
GSM505457	0	1	0	0	0	0	Luminal B	0	-0.24335	1.51737	0.63954	-0.822811	-0.165429	NA
GSM505458	1	1	0	0	1	0	Normal	0	-1.07915	-1.27596	-1.37044	-0.847065	1.12659	NA
GSM505459	1	0	0	1	1	1	Her2	1	-0.666834	1.49104	-0.703186	-0.289391	0.140008	training
GSM505460	1	0	0	0	0	1	Basal	0	0.71696	1.59757	-0.417584	-0.791805	-0.104971	training
GSM505461	0	1	1	0	1	1	Her2	0	-0.533438	1.77111	2.05921	-0.384472	-0.682776	NA
GSM505462	1	0	0	1	1	0	Basal	0	-0.389999	0.217308	0.809052	-3.03523	0.757967	testing
GSM505463	1	1	1	0	1	0	Luminal B	1	-0.30949	1.57754	0.471259	0.00888441	-0.373719	NA
GSM505465	1	1	0	0	1	0	Luminal A	0	-0.285614	0.190019	-0.939426	0.00106298	0.286152	NA
GSM505466	1	0	0	1	1	1	Basal	1	1.48079	1.26544	1.3133	2.19475	-1.61355	training
GSM505469	1	1	0	0	0	0	Luminal A	0	-0.221512	-0.0515444	-0.531765	-0.603724	0.393239	NA
GSM505471	1	1	0	0	1	1	Luminal B	0	-0.383405	1.72817	2.23695	-0.302641	-0.781825	NA
GSM505472	1	1	0	1	0	0	Luminal A	0	-1.44134	-2.2587	-1.44842	-2.34075	1.88114	NA
GSM505474	1	1	0	1	1	1	Luminal B	0	-0.620562	0.549161	1.25897	-0.391851	-0.201049	NA
GSM505475	0	0	0	0	0	1	Basal	0	0.197295	0.84864	-0.506217	-1.52897	0.406767	training
GSM505476	1	0	0	0	0	0	Luminal B	0	-0.361458	-1.36812	-0.014442	-3.33437	1.38222	training
GSM505478	0	0	0	0	0	1	Normal	1	-0.272658	-0.690635	-1.50164	-0.310155	0.707654	training
GSM505480	0	1	0	1	1	0	Luminal B	0	-0.826811	0.806156	0.954665	-0.0944135	-0.213779	NA
GSM505481	0	1	0	0	0	1	Normal	0	-1.12007	0.0289712	-0.173956	-0.882958	0.559652	NA
GSM505482	0	1	1	1	1	0	Luminal A	0	0.135044	0.77278	0.129042	1.17623	-0.580192	NA
GSM505483	1	1	0	0	1	0	Luminal B	0	-1.00018	-0.374105	-0.623236	-0.833856	0.721881	NA
GSM505484	1	1	0	0	0	0	Luminal A	0	-0.493145	0.407533	-1.025	1.97412	-0.298828	NA
GSM505485	0	1	0	0	1	0	Luminal B	0	-0.723971	0.516484	0.84275	-0.222045	-0.10903	NA
GSM505486	1	1	0	0	1	0	Luminal B	0	0.196167	0.676099	1.0091	-0.28478	-0.366746	NA
GSM505487	1	0	0	0	1	1	Her2	0	-0.103646	0.307226	0.435485	-0.725038	0.0662354	training
GSM505488	1	1	0	1	1	0	Luminal A	0	-0.6363	-0.0989869	-1.02581	-1.6094	0.941734	NA
GSM505495	1	0	1	1	1	1	Normal	0	0.374817	1.23257	2.72966	-6.10382	0.810874	testing
GSM505499	0	0	0	1	1	1	Normal	0	-0.812902	-0.525337	1.10553	-6.07002	1.85242	testing
GSM505500	0	0	0	1	1	1	Basal	0	-0.751286	-0.917358	1.88969	-4.11454	1.09102	training
GSM505503	1	0	0	1	1	1	Basal	0	0.644173	1.67005	3.89942	-0.192861	-1.49034	testing
GSM505504	1	0	1	1	1	1	Basal	0	-0.748526	2.45091	3.40372	-0.409855	-1.13468	training
GSM505505	1	0	1	0	1	1	Her2	0	-0.348063	2.36549	0.595709	-1.10847	-0.207014	testing
GSM505506	0	1	0	0	0	0	Luminal A	0	-1.07347	-0.201866	-0.507073	0.510509	0.255276	NA
GSM505508	1	1	0	0	1	0	Normal	0	-1.25821	-1.88934	-0.0591707	-3.08801	1.61447	NA
GSM505509	0	1	0	0	0	0	Luminal A	0	-1.11796	-1.82219	-0.958211	0.13455	0.822356	NA
GSM505510	0	1	0	1	1	1	Luminal A	0	-1.674	-0.725226	-0.14725	-1.63122	1.0512	NA
GSM505512	0	1	0	0	0	0	Luminal A	0	-0.549822	-0.636135	-0.338302	-0.500518	0.492472	NA
GSM505513	0	1	0	1	1	1	Basal	0	0.640077	1.2996	3.29067	-2.00373	-0.686677	NA
GSM505514	0	0	0	0	1	1	Basal	0	0.068937	1.83276	2.8215	-1.48514	-0.69658	training
GSM505515	1	1	0	1	1	0	Luminal A	0	-0.425177	-0.970669	0.178572	-1.16971	0.594076	NA
GSM505516	0	0	0	1	1	1	Basal	0	0.125088	0.664183	0.818966	-0.217083	-0.317061	testing
GSM505517	1	1	0	1	1	0	Normal	0	-0.302163	-0.361911	0.253366	-3.14373	1.0399	NA
GSM505518	1	1	0	0	1	1	Her2	0	0.726861	1.95469	1.45183	-0.220561	-0.873933	NA
GSM505519	1	1	0	1	0	1	Luminal A	0	-1.1412	0.472482	0.959894	-1.36758	0.312574	NA
GSM505520	0	1	0	0	1	0	Luminal A	0	-1.21335	-0.832373	-1.57095	-1.37146	1.28773	NA
GSM505523	0	1	0	0	1	0	Normal	0	-0.900869	-1.72552	-0.260345	-1.85617	1.17919	NA
GSM505524	0	1	0	0	1	0	Her2	0	1.07459	0.0924696	2.99328	1.11483	-1.4299	NA
GSM505525	1	1	0	0	1	0	Luminal B	0	-1.95857	-0.792857	0.621893	-1.31005	0.812553	NA
GSM505526	1	1	0	0	1	0	Her2	0	0.0998986	1.37343	2.64387	0.0688713	-1.04612	NA
GSM505527	1	0	0	1	1	0	Basal	0	-0.62549	1.03522	-0.413827	-1.00714	0.361667	testing
GSM505528	1	0	0	1	1	1	Basal	0	-0.393547	-0.877344	-0.123091	-0.438867	0.426481	training
GSM505529	1	1	0	0	1	0	Luminal A	0	-0.49424	-1.35326	0.108588	0.132863	0.299289	NA
GSM505530	0	1	0	0	0	1	Luminal A	0	-1.13944	-1.35529	-0.432101	-0.94667	0.924846	NA
GSM505532	0	1	0	0	0	1	Luminal A	0	-1.66967	0.184631	0.172853	-0.147556	0.324252	NA
GSM505533	1	0	0	0	0	0	Basal	0	-1.02774	-0.448709	-0.303738	-2.90156	1.29433	testing
GSM505534	1	1	0	0	0	0	Basal	0	1.14461	2.65085	0.744683	0.502069	-1.1273	NA
GSM505535	1	0	0	0	1	1	Basal	1	0.00897444	-0.507299	-0.640873	-0.203219	0.338122	training
GSM505536	1	0	0	1	1	1	Normal	0	-0.914329	-1.10561	-1.44314	-0.0571969	0.833066	testing
GSM505537	1	0	0	0	1	1	Basal	0	-1.38412	-0.600169	0.346591	-2.08417	0.966861	training
GSM505538	0	1	0	0	1	0	Luminal A	0	-1.93905	-0.802495	0.181869	-2.872	1.41676	NA
GSM505539	0	1	0	0	1	0	Luminal A	0	-1.03696	-1.1045	-0.760636	-0.273584	0.736603	NA
GSM505540	1	0	0	0	1	1	Basal	1	-1.62446	-0.912838	0.252375	-1.12632	0.809246	testing
GSM505541	1	0	0	1	1	1	Basal	0	-0.0553909	-0.328737	0.12564	-0.606216	0.22893	training
GSM505542	1	1	0	0	1	0	Her2	0	-0.688289	0.346362	0.552201	-0.883468	0.202191	NA
GSM505543	1	0	0	1	1	1	Basal	0	-0.177068	1.89574	1.29753	-2.02011	-0.0654898	training
GSM505544	0	1	0	0	1	0	Luminal A	0	-1.04881	-0.423723	-1.00351	-1.10583	0.932223	NA
GSM505545	0	0	0	0	1	1	Basal	1	0.950404	0.539691	0.463881	-1.88695	0.144333	testing
GSM505547	0	1	0	1	1	1	Luminal B	0	-0.633124	0.169975	0.699808	0.778639	-0.33169	NA
GSM505548	1	0	0	0	1	0	Normal	0	-1.70508	-1.16369	-0.883645	-3.16024	1.82212	training
GSM505549	1	1	0	0	1	0	Normal	0	-0.916782	-1.28412	-0.61662	-1.31923	1.02947	NA
GSM505550	1	1	0	0	1	0	Luminal A	0	-0.928611	-1.95521	-0.128967	-1.89439	1.20519	NA
GSM505551	0	1	0	1	1	0	Luminal A	0	-0.708529	-1.03945	0.487801	-2.4251	0.972021	NA
GSM505552	0	0	0	0	1	1	Basal	0	-0.233472	0.30387	0.276816	-0.0578749	-0.0675424	testing
GSM505553	1	0	0	0	1	1	Basal	0	-0.714125	0.697492	0.352613	-0.897316	0.199303	training
GSM505554	1	0	0	1	1	1	Basal	0	-0.680754	0.202323	0.513724	-0.863259	0.233032	testing
GSM505556	0	1	0	1	1	0	Luminal A	0	-1.36728	-0.355831	-0.327751	-1.39025	0.888251	NA
GSM505557	0	1	0	0	0	0	Luminal A	0	-0.678301	-1.01594	0.314573	0.530998	0.0928835	NA
GSM505558	1	0	0	1	1	1	Basal	0	-0.863336	1.34122	1.44062	-3.20413	0.518599	training
GSM505559	1	1	0	0	1	1	Luminal B	1	-1.30338	-1.03099	0.243139	-0.852693	0.680284	NA
GSM505560	1	1	0	0	1	0	Luminal B	0	-0.647657	0.39797	1.67368	0.364837	-0.515685	NA
GSM505561	0	0	0	0	0	0	Basal	0	-0.28303	-0.0330346	0.0356194	-1.09135	0.396226	training
GSM505562	1	0	0	1	1	1	Basal	1	-0.583062	3.29363	2.68646	0.669689	-1.4696	testing
GSM505563	1	0	0	0	1	1	Basal	0	-0.464966	0.63197	0.848166	-1.12234	0.0897816	training
GSM505564	0	0	0	0	1	1	Basal	1	1.18954	0.509797	1.41022	-1.96434	-0.141157	testing
GSM505565	0	1	0	0	1	0	Luminal A	0	-1.37504	-0.79994	0.411586	-1.02804	0.658344	NA
GSM505566	1	0	0	0	1	1	Basal	1	-0.313772	1.2852	0.627476	-1.56643	0.128881	training
GSM505567	1	1	0	0	0	0	Luminal A	0	-0.925161	-0.518625	0.66444	-0.987181	0.422876	NA
GSM505568	1	1	0	1	1	1	Her2	0	-0.63285	-0.604917	0.481518	-1.7592	0.666382	NA
GSM505569	0	1	0	0	1	0	Luminal A	0	-0.878833	-1.33472	-0.559504	0.366225	0.492795	NA
GSM505570	0	0	0	0	1	0	Her2	0	-0.343332	-1.28889	0.0729594	-2.03856	0.936916	testing
GSM505571	0	1	0	0	1	1	Luminal B	0	-0.828487	1.21148	2.05842	-1.43874	-0.182815	NA
GSM505572	1	0	0	0	1	1	Normal	0	-0.347855	-1.40758	0.894992	-2.7957	0.96689	training
GSM505573	1	0	0	0	1	0	Luminal B	0	0.456827	2.52645	1.2953	0.96871	-1.25161	training
GSM505574	1	0	0	0	0	1	Basal	0	-0.45995	0.570133	0.86262	-3.13995	0.722041	training
GSM505575	0	0	0	1	0	1	Basal	0	0.634513	1.07567	1.21116	-0.497913	-0.529869	testing
GSM505576	1	1	0	0	0	0	Luminal A	0	-0.324363	-0.0940454	0.581631	-0.155078	-0.0250682	NA
GSM505577	1	0	0	0	0	1	Luminal B	0	-1.09888	1.8552	0.82504	-0.545496	-0.182979	testing
GSM505578	1	1	0	0	0	0	Luminal A	0	-0.238783	-0.902642	0.154464	0.807811	-0.0658397	NA
GSM505579	1	1	0	0	1	0	Luminal A	0	-0.933692	-0.343409	0.630753	-1.15808	0.452972	NA
GSM505580	0	0	0	0	1	0	Basal	1	0.105375	-0.259917	-0.967186	0.329954	0.194607	testing
GSM505581	0	1	0	0	0	0	Luminal A	0	-2.05307	-1.51107	-0.520588	-0.952473	1.17998	NA
GSM505583	1	0	0	0	1	1	Basal	1	1.37382	0.45124	1.84128	-0.303698	-0.804436	testing
GSM505584	1	0	0	1	1	1	Basal	1	-0.0693438	-0.608383	0.295152	-0.615282	0.242018	testing
GSM505585	1	1	0	0	1	0	Luminal A	0	-1.90298	-0.0370739	1.00849	-1.59925	0.635439	NA
GSM505586	1	1	0	0	1	1	Normal	0	-0.830568	-0.473071	0.809	-0.860459	0.313963	NA
GSM505587	1	1	0	0	0	0	Luminal A	0	-1.34211	-1.69306	-0.416572	0.0190391	0.730958	NA
GSM505588	0	0	0	0	0	1	Basal	0	1.10506	-1.59365	0.493853	-1.28572	0.331253	testing
GSM505589	1	1	0	0	1	0	Luminal A	0	-0.320365	-0.93182	-0.634121	-0.128774	0.467302	NA
GSM505590	0	1	0	0	1	0	Luminal B	0	-0.571551	0.844264	1.69023	-0.129787	-0.470367	NA
GSM505591	0	1	0	1	1	1	Luminal B	0	-0.253558	1.07728	0.607063	-0.825412	-0.0677183	NA
GSM505592	1	0	0	0	1	1	Basal	0	0.283466	0.812279	0.91528	-2.07276	0.16807	testing
GSM505593	0	1	0	0	0	0	Luminal A	0	-0.446938	-1.54465	0.855826	0.0855711	0.132966	NA
GSM505594	0	1	0	0	1	0	Luminal B	0	-1.21662	-1.26323	-0.496314	-0.34927	0.756402	NA
GSM505595	1	1	0	1	0	0	Luminal A	0	-0.958882	-1.87855	-0.120232	-2.68293	1.43882	NA
GSM505596	0	1	0	1	0	0	Luminal B	0	-2.10671	0.382083	-0.0793539	-2.28853	1.11449	NA
GSM505597	1	1	0	1	1	1	Luminal A	0	-1.30024	-0.901698	-0.185811	-1.88032	1.09232	NA
GSM505598	1	1	0	0	0	0	Luminal A	1	-1.63143	-1.78052	-0.823753	0.27392	0.845126	NA
GSM505599	0	1	0	0	1	0	Luminal A	0	-1.19885	-1.58611	0.547839	-3.41588	1.47525	NA
GSM505600	0	1	0	1	0	0	Luminal A	0	-0.816341	-0.594317	0.222935	-0.256402	0.310352	NA
GSM505601	1	1	0	0	1	0	Luminal A	0	-2.40158	-0.921456	-0.0431097	-1.17843	1.07805	NA
GSM505602	1	1	0	1	0	1	Luminal B	0	-0.402933	1.11177	2.27275	-1.58193	-0.271084	NA
GSM505603	1	1	0	0	0	0	Luminal A	0	-1.25284	-0.661129	-0.395658	-1.85613	1.08611	NA
GSM505604	0	1	0	0	1	0	Luminal B	0	-1.38693	-1.12335	-0.441744	-1.56439	1.12759	NA
GSM505605	0	1	0	1	1	1	Luminal B	0	-0.668192	0.727361	1.11573	-0.055426	-0.289796	NA
GSM508099	0	0	1	0	0	1	NA	1	-0.531521	0.521156	0.486141	-0.0887179	-0.093807	training
GSM508100	0	1	0	0	0	0	NA	0	-0.432602	-0.749546	0.417911	-2.76323	0.979937	NA
GSM508101	1	1	1	0	0	0	NA	0	-1.18434	-0.781076	-1.1538	-1.52175	1.20194	NA
GSM508102	0	1	1	0	1	0	NA	0	-0.965388	-0.214406	-0.252602	-1.43563	0.766611	NA
GSM508103	0	0	0	0	0	0	NA	0	-1.15908	0.943441	0.226233	-1.51169	0.473645	testing
GSM508104	0	0	0	0	0	1	NA	1	-1.63	-0.916472	-1.12517	-1.17901	1.21086	training
GSM508106	1	0	0	0	1	1	NA	0	-1.67594	0.917502	-0.94408	-1.41027	0.885192	testing
GSM508107	1	1	0	0	0	0	NA	0	-0.899434	-0.243431	0.85593	-1.09448	0.343697	NA
GSM508108	1	1	0	0	1	0	NA	0	-0.425834	0.968706	-0.027174	-5.35346	1.57075	NA
GSM508109	0	1	1	0	0	0	NA	0	-1.30849	-1.27436	-0.786831	-0.642093	0.950127	NA
GSM508110	0	1	0	1	0	0	NA	0	-0.762358	0.148994	-0.789001	-1.29542	0.757623	NA
GSM508111	1	0	0	1	0	1	NA	0	-0.045534	1.28401	0.172195	-0.612466	-0.0980991	testing
GSM508113	0	0	0	1	0	1	NA	0	0.963864	1.63263	0.929546	1.56094	-1.26952	training
GSM508114	0	0	1	1	1	1	NA	1	-0.452119	0.283774	1.01238	-2.45026	0.520631	training
GSM508117	1	1	0	0	1	1	NA	0	-1.27203	1.30752	0.33986	-0.733848	0.15461	NA
GSM508118	0	1	0	1	1	1	NA	0	-0.3432	0.669976	2.0722	-2.40546	0.112983	NA
GSM508123	0	1	0	0	1	1	NA	0	-1.27129	-1.49384	-0.443935	-0.646975	0.890849	NA
GSM508126	1	1	1	0	1	0	NA	0	-1.15052	-0.888172	0.498842	-1.66991	0.801423	NA
GSM508131	1	0	0	0	0	1	NA	0	-1.22762	-0.437308	0.0609267	-2.35267	1.0639	training
GSM508134	0	0	0	1	1	1	NA	0	-0.797284	-0.789931	1.09172	-4.20068	1.32498	training
GSM508135	0	1	1	1	1	1	NA	0	-1.03663	-0.670515	-0.510037	-0.627611	0.692055	NA
GSM508136	0	1	0	1	1	0	NA	0	-0.105617	1.17717	1.13472	0.320501	-0.621293	NA
GSM508140	1	1	0	0	1	0	NA	0	-1.1259	-0.613063	-0.00855615	-1.85891	0.942321	NA
GSM508142	0	1	0	0	1	0	NA	0	-1.26103	-0.479303	0.644622	-2.34366	0.914095	NA
GSM508143	0	1	0	1	1	0	NA	0	-0.556536	-0.564937	-0.280069	-0.0681253	0.329852	NA
GSM508144	1	0	0	1	1	0	NA	0	-0.579995	-0.160605	0.65391	-2.08262	0.620697	testing
GSM508148	1	0	1	1	1	1	NA	0	-0.893137	1.57211	1.10748	0.0958654	-0.449948	training
GSM508149	0	1	0	0	0	1	NA	1	-0.335841	1.71712	1.24547	-0.118129	-0.571261	NA
GSM508152	0	0	0	1	0	1	NA	1	-1.43827	-0.755525	0.708324	-1.87459	0.843226	training
GSM508154	1	0	0	0	0	1	NA	0	-1.43235	-1.22185	0.177079	-1.7431	1.03979	testing
GSM508155	1	1	0	0	1	1	NA	0	-1.58041	-0.791094	0.854333	-3.15231	1.23639	NA
GSM508156	0	0	1	1	1	1	NA	0	-0.494153	1.35675	0.137256	-0.725823	0.0300175	testing
GSM508159	1	1	0	1	1	0	NA	0	-0.258267	0.22913	1.00692	-0.42673	-0.136479	NA
GSM508164	0	1	1	1	1	1	NA	1	-0.348709	0.674909	-0.584372	0.428681	-0.0258625	NA
GSM508165	0	0	1	0	0	1	NA	1	0.300113	0.772552	-0.344418	-1.23658	0.263596	training
GSM508166	0	0	0	1	1	0	NA	0	-0.761296	0.225799	-0.360082	1.22764	-0.158916	training
GSM508167	1	1	0	0	0	0	NA	0	-1.6936	-1.36519	-1.47025	-1.47279	1.49909	NA
GSM508168	1	1	0	0	0	0	NA	0	-0.847226	0.22079	2.17817	0.0472537	-0.479835	NA
GSM508169	1	1	0	1	1	1	NA	0	-0.762303	3.13656	0.871219	-0.143959	-0.642743	NA
GSM508170	1	0	0	0	1	0	NA	1	-0.379463	-1.91516	0.102859	-4.33245	1.76929	testing
GSM508171	1	0	1	0	1	1	NA	1	-0.223691	1.08087	2.06634	-0.926692	-0.449631	testing
GSM508174	0	0	0	0	1	1	NA	1	-0.233176	1.53959	0.726774	-0.560867	-0.277427	training
GSM508177	0	1	0	0	1	0	NA	0	-0.762687	0.0925877	0.210381	0.01042	0.0858135	NA
GSM508179	0	0	0	1	1	1	NA	1	-0.908744	0.296736	-0.642073	-0.400458	0.442384	training
GSM508181	0	1	0	1	0	1	NA	0	-0.794283	2.01629	1.8005	-0.511103	-0.562606	NA
GSM615096	0	1	0	0	1	0	Luminal A	0	-0.389287	-0.394537	-0.127433	-0.480635	0.345746	NA
GSM615097	0	1	0	1	1	0	Normal	0	-1.10752	-2.15504	-0.0946427	-1.75044	1.22877	NA
GSM615098	0	0	0	1	0	1	Basal	0	0.331754	0.14385	1.95538	-2.42254	0.10662	testing
GSM615100	0	1	0	1	1	0	Luminal A	0	-0.822671	-0.604461	-0.186187	-1.17969	0.713723	NA
GSM615101	1	0	0	1	0	1	Basal	0	0.366571	2.96942	1.87081	-1.17571	-0.813749	training
GSM615108	0	1	1	1	1	1	Luminal B	0	-0.376177	3.00777	2.96093	-0.685579	-1.11523	NA
GSM615114	1	1	0	0	0	0	Luminal A	0	-1.30168	-1.671	-1.02057	-1.35847	1.31292	NA
GSM615115	0	0	0	1	1	0	Basal	0	0.279962	0.796121	-0.203657	-0.771372	0.0800256	training
GSM615116	1	0	1	1	1	1	Basal	0	-0.793725	0.769516	0.441141	-1.05412	0.226532	training
GSM615117	0	1	0	1	1	1	Basal	0	-0.316149	2.3419	1.82393	-1.04604	-0.570521	NA
GSM615120	1	1	0	1	0	0	Luminal A	0	-1.11477	-2.02809	-0.995196	-0.604334	1.10104	NA
GSM615122	0	1	0	1	1	0	Luminal A	1	-1.02314	-1.12724	-0.266461	-0.885155	0.790047	NA
GSM615123	1	1	0	0	0	1	Luminal B	1	0.380436	2.18194	1.5012	1.53934	-1.40214	NA
GSM615124	1	1	0	1	1	0	Basal	0	0.215815	2.59238	0.768581	-1.2849	-0.367043	NA
GSM615125	0	1	0	0	0	0	Normal	0	-1.68219	-0.406697	-0.653407	-1.88371	1.2101	NA
GSM615126	0	1	0	1	0	1	Luminal A	0	-0.83186	0.163549	-0.325915	-0.565175	0.414675	NA
GSM615127	1	1	0	0	0	0	Luminal A	0	0.151855	0.0832358	0.236471	-1.94546	0.487988	NA
GSM615130	0	1	0	1	1	0	Her2	0	-0.430631	-1.08128	-0.754406	-2.53541	1.29972	NA
GSM615133	1	1	0	0	0	0	Luminal A	0	-0.818575	-1.4079	-0.638786	-0.355368	0.739666	NA
GSM615134	0	1	0	0	1	0	Normal	0	-1.15452	-1.09196	-0.672682	-1.05733	0.978124	NA
GSM615135	1	0	0	0	1	1	Normal	0	-0.130478	-0.600911	-0.0167797	-0.486366	0.300694	testing
GSM615136	1	0	0	1	1	1	Basal	0	0.280739	1.2385	1.55466	-1.35604	-0.314369	training
GSM615138	0	1	0	1	1	0	Luminal B	0	0.167889	1.16128	0.217863	-0.531197	-0.158455	NA
GSM615140	0	0	1	1	1	0	Basal	1	-0.0710085	-0.287619	-0.183098	-2.86495	1.01031	testing
GSM615144	1	1	0	0	0	0	Luminal A	0	-0.481218	-0.116105	0.188162	-1.57337	0.562371	NA
GSM615145	1	0	0	1	1	1	Basal	0	-0.902895	0.234713	1.40949	-1.04521	0.0820659	training
GSM615146	0	0	0	0	0	1	Basal	1	1.26617	-0.028658	0.869059	-1.45992	-0.0587383	testing
GSM615148	0	0	0	1	1	1	Basal	0	-0.27728	-1.17119	-0.0809715	-1.76564	0.857917	testing
GSM615149	0	0	0	1	1	1	Basal	0	1.37977	0.748671	0.789088	-3.10769	0.298278	training
GSM615150	0	1	0	1	1	0	Luminal A	0	-1.03297	-0.349515	-0.830798	-1.67697	1.04329	NA
GSM615151	0	0	0	0	0	0	Basal	0	0.480231	1.72171	-0.11972	-1.72901	0.129854	testing
GSM615153	1	1	0	1	1	0	Luminal B	0	-0.344799	-0.566826	0.0305893	-0.974729	0.478778	NA
GSM615154	0	0	0	0	1	1	Basal	1	-0.107194	-0.407987	-0.753644	1.00893	-0.000287052	testing
GSM615155	0	1	0	1	1	1	Basal	0	0.572327	2.29453	1.23188	0.616244	-1.10466	NA
GSM615156	0	0	0	0	1	1	Basal	0	1.11072	0.355655	0.0963047	0.721791	-0.560914	training
GSM615157	0	1	0	0	1	0	Her2	0	-0.536702	-0.430326	-1.2546	-0.838155	0.809224	NA
GSM615158	1	1	0	0	0	0	Luminal A	0	-0.630002	-2.07158	-1.00806	-0.691052	1.03469	NA
GSM615160	0	0	0	1	1	1	Basal	0	0.148022	1.36939	1.47323	-0.243376	-0.633219	training
GSM615162	0	1	0	1	1	0	Luminal A	0	-1.94495	-1.36417	-0.666232	-0.382917	0.991918	NA
GSM615164	0	0	0	1	0	1	Basal	1	-0.426699	0.409439	1.46636	-0.380324	-0.277244	testing
GSM615165	0	1	0	0	0	0	Normal	0	-1.03114	0.826673	-0.952773	-1.66675	0.844769	NA
GSM615167	0	0	0	0	1	0	Normal	1	-0.546854	-1.57807	-1.86928	-1.65183	1.45806	testing
GSM615169	0	0	0	1	1	1	Basal	0	-0.0489949	0.202711	-0.655097	-2.01863	0.779155	training
GSM615172	1	1	0	0	0	0	Luminal A	0	-1.20863	-1.37444	-0.547022	-1.37905	1.10959	NA
GSM615174	0	1	0	0	1	1	Luminal B	0	0.206429	1.86633	1.13099	-0.225974	-0.652763	NA
GSM615175	0	0	0	1	0	1	Basal	1	-0.517963	1.97567	0.665087	-2.6581	0.366724	training
GSM615176	0	1	0	1	0	0	Normal	0	-0.570653	-2.10517	-0.902222	-1.9696	1.39516	NA
GSM615178	0	0	0	0	1	1	Basal	0	-0.797646	1.45185	1.45461	-1.79877	0.0433352	testing
GSM615195	0	0	0	1	1	1	Basal	0	-1.05691	-0.168312	1.87676	-2.41431	0.488242	testing
GSM615218	1	0	0	1	1	1	Basal	0	-0.512903	0.727024	0.610152	-1.3145	0.207488	testing
GSM615223	1	0	0	1	1	1	Basal	0	0.287913	0.172032	1.40998	-1.43852	-0.0425438	training
GSM615263	1	0	0	1	1	1	Normal	1	-0.665553	0.11975	0.954874	-0.954958	0.15145	testing
GSM615306	1	1	0	1	1	0	Luminal A	0	0.0940392	-0.58978	0.0760067	-1.91448	0.666579	NA
GSM615308	1	1	0	0	1	1	Luminal B	0	-1.70196	-0.896428	0.98375	-1.12985	0.620432	NA
GSM615310	1	1	0	0	1	1	Basal	1	0.531531	0.261428	0.53134	-1.79369	0.241765	NA
GSM615311	0	1	0	1	1	0	Luminal A	0	-1.0099	-0.18592	0.534637	-0.216609	0.17382	NA
GSM615314	1	1	0	0	1	0	Luminal A	0	-0.375148	-0.336672	0.203242	0.230377	0.0190171	NA
GSM615315	0	0	0	1	1	1	Basal	0	-1.00126	1.55866	2.94333	-2.80688	-0.0350988	training
GSM615317	0	0	0	0	1	1	Basal	0	-0.0861005	1.06043	2.48565	-0.787198	-0.635458	training
GSM615319	1	0	0	0	1	1	Basal	0	-0.635654	-0.413907	-0.781081	-2.4051	1.18139	testing
GSM615323	0	0	0	1	1	1	Normal	0	-1.50531	-0.443885	-0.225197	-1.77626	1.02646	testing
GSM615325	0	0	0	0	1	1	Basal	1	3.74789	2.00505	0.141513	-0.794417	-0.997205	testing
GSM615326	1	1	0	0	0	1	Basal	0	1.43125	0.816183	3.46315	-0.477907	-1.28531	NA
GSM615327	1	0	0	1	0	1	Basal	0	1.08459	-0.468678	0.837292	0.598985	-0.562966	testing
GSM615346	0	0	0	0	1	1	Basal	0	0.276304	0.930033	1.29189	-0.398608	-0.47699	training
GSM615353	0	1	0	0	1	1	Luminal B	1	-1.30453	-0.104907	0.528417	-0.340854	0.26227	NA
GSM615358	1	1	0	1	0	0	Luminal B	0	-1.28401	1.14042	1.71863	-1.88091	0.161533	NA
GSM615364	0	0	0	0	1	1	Basal	0	-0.32099	0.0286508	0.260546	-0.405639	0.117337	testing
GSM615368	0	0	0	0	1	1	Basal	0	2.10308	3.6096	2.80766	-1.32119	-1.53105	training
GSM615371	1	0	0	0	1	1	Basal	1	0.544005	0.8834	2.51892	-1.57997	-0.501375	testing
GSM615372	0	0	0	0	1	1	Basal	0	-0.399417	0.789848	0.926498	-0.280461	-0.237908	training
GSM615375	1	0	0	0	1	1	Basal	1	0.968157	1.0413	2.14841	-0.738937	-0.781763	testing
GSM615376	1	0	0	0	1	0	Basal	0	-0.579152	0.535736	1.26249	-2.25157	0.367991	testing
GSM615378	0	0	0	0	1	1	Basal	0	1.11544	0.966547	1.5426	-1.36299	-0.437179	testing
GSM615379	1	0	0	1	1	1	Basal	1	0.709239	-0.559844	0.649204	-1.1199	0.121375	testing
GSM615380	0	0	0	1	1	1	Basal	0	-0.247742	0.0935406	1.57728	-2.75271	0.449804	testing
GSM615382	1	0	0	0	0	1	Basal	0	-0.488392	-1.15168	0.857569	-1.85791	0.667362	testing
GSM615384	1	0	0	1	1	1	Basal	0	-0.414717	0.454082	0.621642	-3.61258	0.948356	testing
GSM615385	0	0	0	1	1	0	Basal	0	0.0422906	-0.81092	0.594154	-1.93355	0.582565	testing
GSM615387	0	0	0	0	1	1	Basal	0	-1.08754	-0.776641	0.626265	-2.6337	1.02929	testing
GSM615390	0	0	0	0	1	1	Basal	0	-0.668663	1.54386	1.70205	-0.907379	-0.347718	training
GSM615392	1	0	0	1	1	1	Basal	0	3.26597	2.53113	2.13572	-0.368762	-1.68186	testing
GSM615393	0	0	0	1	1	1	Basal	1	0.00918253	0.923624	0.861816	-0.990156	-0.114704	testing
GSM615394	1	0	0	0	0	1	Basal	1	0.345532	0.105043	1.40147	-2.44578	0.272536	training
GSM615396	0	0	0	1	1	1	Basal	1	-0.634986	1.51179	0.939115	0.441113	-0.554414	testing
GSM615397	1	0	0	0	1	0	Basal	1	-0.63435	0.661501	2.48064	-1.47601	-0.223888	training
GSM615399	1	1	0	1	1	0	Luminal A	0	-1.73599	-1.22287	0.199757	-3.06993	1.51084	NA
GSM615632	0	0	1	0	1	1	Basal	1	1.08521	-0.38672	0.39299	0.857834	-0.535629	training
GSM615634	0	1	0	0	0	0	Luminal B	1	-0.551761	0.374527	1.43129	0.842614	-0.612567	NA
GSM615635	0	1	0	1	1	1	Luminal B	1	-0.775205	1.57152	1.10352	-1.84655	0.127689	NA
GSM615636	1	1	0	1	1	1	Luminal B	1	-1.43496	0.61497	1.82153	-0.934824	-0.0252907	NA
GSM615637	0	0	0	1	0	1	Basal	1	-0.452853	0.0834888	-0.118625	-0.456915	0.256714	training
GSM615638	1	1	0	0	1	1	Basal	0	-1.99201	-1.03806	5.42646	-2.81852	-0.00204836	NA
GSM615639	0	0	0	1	1	1	Basal	1	0.907285	-0.129429	0.967783	0.674611	-0.650245	training
GSM615640	0	0	0	1	0	1	Basal	0	0.367293	0.707139	1.7105	-0.300224	-0.600361	training
GSM615641	0	0	0	0	1	1	Basal	0	1.80477	0.0546573	0.394158	1.48944	-0.973859	testing
GSM615642	1	1	0	1	0	1	Luminal A	0	-1.06428	0.550476	1.01251	0.240707	-0.232419	NA
GSM615643	1	0	1	1	1	0	Basal	0	-1.28618	-0.318398	0.148224	-1.00893	0.612705	training
GSM615644	1	0	0	1	1	1	Basal	1	-0.220154	2.73163	2.11812	1.1834	-1.44007	training
GSM615645	0	1	0	1	1	1	Luminal B	0	0.381323	0.0297049	0.853373	0.263518	-0.407752	NA
GSM615646	1	1	0	1	0	0	Luminal A	0	-1.74603	-0.66543	-0.0877445	-0.181865	0.589427	NA
GSM615648	1	1	0	1	0	1	Basal	0	0.0523666	0.620088	0.342323	0.831814	-0.485131	NA
GSM615649	1	0	0	1	1	1	Basal	0	-0.375695	0.939815	1.07967	-0.116546	-0.365676	training
GSM615650	1	0	0	1	0	1	Basal	0	-1.17468	-0.271942	-0.0647644	-2.54452	1.11467	training
GSM615651	1	0	0	0	1	0	Basal	0	-0.8176	1.82603	1.65194	-0.200124	-0.575551	training
GSM615652	0	1	0	1	1	1	Her2	0	-0.51713	1.89169	2.10482	2.22427	-1.53103	NA
GSM615653	1	1	0	1	1	0	Luminal B	0	-0.987971	-0.429997	0.343241	-0.366321	0.316227	NA
GSM615654	0	1	0	1	1	1	Luminal A	0	-0.751154	-0.901681	0.389306	-3.81994	1.41419	NA
GSM615656	0	1	0	1	0	0	Normal	1	-1.71155	-0.667572	0.0408374	-1.7501	1.03263	NA
GSM615658	1	0	0	0	1	1	Basal	1	-0.751121	0.553031	0.854229	-1.68401	0.339677	training
GSM615659	1	1	0	1	1	0	Luminal A	0	-0.313006	-0.859214	-0.407514	1.00147	0.0382028	NA
GSM615660	0	0	0	0	1	1	Basal	1	3.01059	2.37099	1.85673	-0.830481	-1.3745	testing
GSM615661	1	0	0	0	1	1	Basal	0	0.43708	0.638531	1.71508	1.23671	-1.07979	testing
GSM615662	0	1	0	1	1	1	Luminal B	0	-0.250601	2.00245	1.27947	0.319253	-0.790324	NA
GSM615663	1	1	0	1	1	1	Luminal B	1	-0.0492468	1.42361	1.64365	-0.308787	-0.628091	NA
GSM615664	0	1	0	1	1	1	Normal	0	-0.498632	-1.45269	0.973304	0.333069	0.0168902	NA
GSM615665	1	1	0	0	1	0	Luminal A	1	-0.23253	1.38548	2.18299	0.791151	-1.07188	NA
GSM615667	1	0	0	1	1	1	Basal	0	0.208335	-0.774102	0.269761	-3.41949	1.09017	training
GSM615669	0	1	0	1	0	1	Luminal B	1	0.414431	0.874242	0.890526	0.0643085	-0.5279	NA
GSM615670	1	1	0	1	0	0	Luminal B	0	-1.58566	0.262937	1.06887	-1.80011	0.553597	NA
GSM615671	0	0	0	1	0	0	Basal	0	0.552909	-1.1767	1.26821	-0.461977	-0.100816	testing
GSM615673	0	1	0	1	0	0	Luminal B	0	0.0927359	-1.14653	0.0966804	-3.61451	1.29637	NA
GSM615674	0	0	0	0	1	1	Basal	0	0.358378	0.728904	1.76528	-1.28898	-0.311452	testing
GSM615675	0	1	0	1	0	1	Luminal A	0	-0.462129	-0.265744	0.795266	0.411877	-0.196914	NA
GSM615676	0	0	0	0	1	1	Basal	1	3.0857	1.65812	3.18493	0.445879	-2.0173	training
GSM615678	1	1	0	0	0	1	Her2	0	-0.420347	1.30344	1.42913	-2.00809	0.0622591	NA
GSM615680	0	0	0	1	0	1	Basal	1	-0.146468	3.77371	1.88651	-1.51486	-0.758128	testing
GSM615682	0	0	0	0	1	0	Luminal A	0	-0.0230713	1.6533	1.29689	0.649551	-0.879	testing
GSM615683	1	1	0	0	1	0	Luminal A	0	-0.910759	-0.145468	0.050762	0.640111	0.0135526	NA
GSM615684	1	0	0	0	0	1	Normal	0	-1.1672	-0.358588	0.0285856	-1.54266	0.79341	training
GSM615685	1	1	0	0	1	1	Luminal A	0	-0.148692	-1.26908	-0.207153	-1.66244	0.852176	NA
GSM615686	0	1	0	0	0	0	Luminal A	0	-1.19667	-0.403999	0.261162	-1.26902	0.659109	NA
GSM615687	0	0	0	1	0	1	Basal	0	0.696206	-0.246315	2.24758	-1.00495	-0.417271	training
GSM615688	0	1	0	0	0	0	Luminal A	0	-1.0601	-0.143967	0.113211	-0.321239	0.326269	NA
GSM615689	0	0	0	1	0	1	Basal	0	0.0739202	-0.50907	1.50909	-1.26081	0.053814	testing
GSM615690	0	1	0	0	0	0	Luminal A	0	-0.700665	-0.237031	1.00575	-3.55706	1.02084	NA
GSM615691	0	0	0	0	1	1	Basal	0	-0.512311	-1.16055	0.185324	-3.00906	1.21816	training
GSM615692	1	1	0	0	1	0	Luminal A	0	-1.64162	-0.0207397	0.688025	-1.84554	0.741026	NA
GSM615693	0	0	0	0	1	1	Luminal A	0	-0.901942	-0.73801	0.6709	-0.754058	0.386478	training
GSM615694	0	0	0	0	1	1	Basal	1	-1.00032	-0.218926	1.28506	-1.8083	0.462648	training
GSM615695	1	1	0	1	1	1	Basal	1	-1.26837	2.09344	-0.139841	-0.215851	-0.0261847	NA
GSM615696	1	0	0	0	1	1	Basal	0	-0.734967	-2.23393	0.401547	-2.75868	1.33762	testing
GSM615697	1	1	0	0	1	1	Luminal A	0	-0.443248	-0.204598	0.267549	-1.0206	0.37793	NA
GSM615698	1	1	0	0	0	1	Luminal A	0	-1.7266	-2.64584	1.14704	-2.56893	1.36683	NA
GSM615699	0	0	0	1	1	1	Basal	0	-0.255266	-0.846986	0.606677	-1.95494	0.657338	training
GSM615700	1	1	0	1	0	0	Luminal A	0	-0.855232	-1.9916	-0.420674	-0.559659	0.863841	NA
GSM615701	1	1	0	0	1	1	Basal	0	-1.13835	-1.51878	1.8157	-1.70552	0.566059	NA
GSM615702	1	1	0	0	0	1	Luminal B	0	0.136654	0.878003	1.40306	1.01392	-0.905276	NA
GSM615703	1	1	0	0	0	1	Normal	0	-0.6692	-1.04924	0.73386	-2.42745	0.897637	NA
GSM615704	1	1	0	0	1	0	Normal	0	-1.28194	-2.01823	0.997526	-2.40122	1.13776	NA
GSM615705	0	1	0	0	1	0	Luminal A	0	-0.89869	-0.767921	0.401505	-2.41183	0.980375	NA
GSM615706	0	0	0	1	1	0	Basal	1	0.278658	2.26125	1.12114	-0.561482	-0.638577	testing
GSM615707	1	0	0	0	0	1	Basal	0	-0.653615	1.10441	0.853436	-0.523878	-0.148151	training
GSM615708	1	1	0	0	1	0	Luminal B	0	-0.0970088	-0.184208	1.70076	-2.5746	0.381559	NA
GSM615709	0	1	0	1	1	1	Luminal B	0	0.205707	2.04278	1.15999	-0.397192	-0.641951	NA
GSM615710	0	1	0	1	0	0	Luminal A	0	-1.26481	-1.78506	-0.59246	-1.96547	1.3961	NA
GSM615711	0	1	0	0	0	0	Luminal A	0	-0.808039	-1.16296	-0.353841	-1.04747	0.824917	NA
GSM615712	1	0	0	0	1	1	Basal	0	0.0339014	-0.182631	0.419476	-3.24422	0.91695	training
GSM615713	0	1	0	0	1	0	Luminal A	0	-0.470726	-0.343662	0.792824	-2.06801	0.589411	NA
GSM615714	1	0	0	0	1	1	Basal	0	-0.267697	-1.07038	0.99666	-1.9523	0.594162	testing
GSM615715	1	0	0	0	0	1	Basal	0	0.38405	0.723423	1.16529	-0.777877	-0.307393	training
GSM615716	0	0	0	1	1	1	Basal	0	-0.503374	-0.260288	0.727453	-1.10108	0.298777	training
GSM615717	0	1	0	1	1	1	Normal	0	-2.24437	-1.9119	0.138122	-1.84576	1.39307	NA
GSM615718	1	1	0	0	1	0	Luminal A	0	-1.18079	-1.246	-0.876246	0.274466	0.657686	NA
GSM615719	0	1	0	1	0	0	Luminal A	0	-1.3565	-1.74866	-0.242395	-2.65662	1.52572	NA
GSM615720	0	1	0	1	1	1	Luminal B	0	-1.04083	-0.228893	0.025006	-1.44194	0.710509	NA
GSM615721	1	1	0	0	0	0	Luminal A	0	-1.29671	0.117936	-0.538621	-1.82772	0.974997	NA
GSM615722	0	1	0	0	1	0	Luminal A	0	-1.50818	-0.842129	1.15462	-1.65797	0.68392	NA
GSM615723	0	1	0	1	1	1	Luminal B	1	-1.12693	1.86481	2.87856	-0.645427	-0.719285	NA
GSM615724	1	1	0	0	0	1	Luminal A	1	-2.04891	-0.551731	-0.243042	-0.421761	0.75064	NA
GSM615725	0	1	0	0	0	1	Luminal A	0	-1.47546	2.3396	0.803635	1.17161	-0.721722	NA
GSM615726	1	1	0	1	1	1	Luminal B	0	-0.627867	-0.107909	-0.496063	2.2238	-0.39385	NA
GSM615727	0	0	0	0	1	1	Basal	1	0.745381	0.125298	-0.438905	-2.19153	0.615149	training
GSM615728	0	1	0	0	1	1	Basal	0	-0.271585	0.343799	2.02755	1.13062	-0.922628	NA
GSM615729	1	1	0	1	1	1	Luminal A	0	-2.16961	-0.390574	0.17184	-2.08488	1.14549	NA
GSM615730	0	1	0	1	0	1	Basal	0	-1.01477	0.544556	0.247888	-0.0517207	0.0614122	NA
GSM615731	0	1	0	0	0	0	Luminal B	0	-1.23528	-0.377334	-0.155631	0.434632	0.25027	NA
GSM615732	0	1	0	1	1	1	Basal	0	-0.440258	-1.70407	-0.33752	-0.638336	0.719018	NA
GSM615733	1	0	0	0	0	1	Basal	1	0.17526	1.93501	-0.618676	-0.819936	0.0116652	training
GSM615734	1	1	0	0	0	0	Luminal A	0	-0.897989	-0.312487	-0.44667	0.0510427	0.364295	NA
GSM615735	1	1	0	0	1	1	Luminal B	0	-1.56412	1.12099	0.851787	-2.11828	0.540956	NA
GSM615736	1	1	0	0	1	1	Luminal B	1	-0.212761	2.03326	-0.373513	0.593501	-0.429508	NA
GSM615737	1	1	0	0	0	1	Basal	1	0.353822	1.24524	1.05621	-0.0856508	-0.586573	NA
GSM615738	1	1	0	1	0	0	Luminal A	0	-1.03111	-1.45492	-0.210263	0.124028	0.527126	NA
GSM615739	1	0	0	1	0	1	Basal	0	-0.184275	2.63721	1.15974	1.18067	-1.16193	testing
GSM615740	0	1	0	0	0	0	Luminal A	0	-2.75637	-0.890887	-0.550967	-1.75485	1.46914	NA
GSM615741	0	1	0	0	0	1	Basal	0	-0.205894	3.0079	2.18002	-1.58892	-0.654917	NA
GSM615742	0	0	0	0	1	1	Basal	1	-1.19887	-1.54685	0.510363	-2.10157	1.07069	training
GSM615743	0	1	0	0	1	0	Luminal A	0	-0.466422	-0.220376	-0.58695	-1.34577	0.724623	NA
GSM615744	0	0	0	0	0	1	Normal	1	0.740967	-1.17481	-0.119846	-1.59204	0.594531	testing
GSM615745	0	1	0	0	0	0	Luminal A	0	-0.871813	-1.03101	0.368945	-0.627383	0.481731	NA
GSM615746	1	0	0	0	1	0	Normal	0	-1.17666	-0.664924	1.34082	-4.03259	1.26161	testing
GSM615747	0	1	0	0	0	0	Luminal A	0	-2.07924	0.408941	-0.0442159	-2.3804	1.12199	NA
GSM615748	1	1	0	0	0	1	Basal	1	-0.413852	1.97013	-0.414882	-3.25522	0.830823	NA
GSM615749	0	1	0	0	1	1	Luminal B	0	-1.37967	-0.917349	1.51748	0.402524	-0.0689576	NA
GSM615750	0	1	0	1	1	1	Luminal A	0	-1.01192	-0.0423696	0.969683	-1.36444	0.381006	NA
GSM615751	0	0	0	0	1	1	Luminal A	0	-2.51669	-1.18884	0.461857	-3.61188	1.76878	training
GSM615752	1	1	0	0	0	0	Luminal A	0	-1.34122	-1.28325	0.401119	-1.76736	0.977119	NA
GSM615753	0	1	0	1	1	1	Her2	0	-0.764636	0.48433	0.187275	-0.549396	0.189936	NA
GSM615754	1	1	0	0	1	1	Her2	0	-0.886664	-0.771286	0.33293	-0.907016	0.531102	NA
GSM615755	0	1	0	1	1	1	Basal	0	0.202465	0.0021383	0.531298	0.583785	-0.373179	NA
GSM615771	0	0	0	1	1	1	Her2	0	-0.00239381	2.00027	0.752541	-0.459915	-0.455656	testing
GSM615772	1	1	0	1	1	1	Luminal A	0	-1.66958	-1.06169	0.117312	-2.94339	1.44878	NA
GSM615773	1	0	0	0	1	0	Basal	1	-0.505379	-0.462041	-1.02574	-1.56839	0.97123	training
GSM615776	0	0	0	1	1	1	Basal	0	0.295185	-0.988294	0.677496	-1.9812	0.553746	testing
GSM615779	1	1	0	0	0	0	Normal	1	-0.183705	0.942438	-0.83324	-0.692998	0.303154	NA
GSM615781	1	1	0	1	0	0	Luminal B	0	-1.51435	1.48064	0.190072	-2.84824	0.870553	NA
GSM615782	1	1	0	1	1	1	Normal	1	-1.99625	-1.55215	-1.28491	-2.48275	1.86264	NA
GSM615783	0	1	0	1	0	0	Normal	0	-1.27441	0.766801	1.02684	-2.72385	0.685951	NA
GSM615784	1	0	0	0	1	1	Normal	0	-2.15398	-0.365647	-1.17725	-1.07728	1.2004	testing
GSM615785	1	0	0	1	1	0	Her2	0	-0.522004	1.26388	1.72109	1.03861	-0.933515	training
GSM615786	1	1	0	1	1	1	Basal	0	1.08031	-0.32264	1.53873	-0.77542	-0.359686	NA
GSM615787	0	0	0	1	1	1	Basal	0	0.647612	0.134743	1.8839	-0.761261	-0.455195	testing
GSM615788	1	1	0	1	1	1	Luminal B	0	-0.89639	1.23065	1.55003	-1.5882	0.0160067	NA
GSM615789	0	1	0	0	1	0	Luminal B	0	0.347021	2.80628	0.86526	0.504813	-1.01877	NA
GSM615797	1	1	0	1	1	0	Luminal A	0	-2.30969	2.06902	0.887854	-0.579865	0.031496	NA
GSM615800	0	0	0	1	0	1	Basal	0	0.39141	-1.20421	0.382992	-2.02355	0.66996	testing
GSM615804	0	0	0	1	1	1	Basal	0	-0.481887	-1.00719	-0.408223	-2.55173	1.20514	training
GSM615807	0	1	0	0	1	0	Luminal A	0	-1.59134	-0.706101	0.112251	-0.943352	0.744109	NA
GSM615808	1	1	0	1	1	1	Luminal B	0	-0.0218995	-0.190347	1.14892	0.724248	-0.502419	NA
GSM615809	1	1	0	1	1	0	Luminal B	0	-0.831203	-0.0388279	0.0798576	-1.16179	0.525906	NA
GSM615810	0	1	0	1	1	1	Luminal A	0	0.271737	2.37656	-0.0302213	0.579881	-0.692842	NA
GSM615811	1	1	0	1	1	1	Luminal A	0	-1.08597	-0.115169	0.0770816	-0.803958	0.48595	NA
GSM615814	1	1	0	0	0	0	Luminal B	0	-1.20893	-0.768259	-0.335641	1.10989	0.161436	NA
GSM615819	0	1	0	0	1	0	Luminal A	0	0.127333	0.0671546	0.142755	-2.02356	0.546732	NA
GSM615820	0	1	0	1	1	0	Luminal A	0	-2.10755	-1.24037	-0.284609	-1.61252	1.27803	NA
GSM615825	0	1	0	0	1	1	Luminal A	0	-0.816012	2.83384	0.191585	-0.812142	-0.175928	NA
